# Supplementary material for: Neuropsychiatric and cognitive symptoms across the Alzheimer’s disease clinical spectrum: Cross-sectional and longitudinal associations
Source: bioRxiv or medRxiv preprint supplement (doi:10.1101/2021.02.18.21251064), 2021-02-20
Supplement: Supplementary file [file media-1.pdf]

**Table e-1. Baseline neuropsychiatric inventory scores according to clinical AD stage.**

|                      | Preclinical AD (n=113) |           |           | MCI due to AD (n=321) |           |           | AD dementia (n=1,090) |                           |                           |
|----------------------|------------------------|-----------|-----------|-----------------------|-----------|-----------|-----------------------|---------------------------|---------------------------|
|                      | Pre                    | Fre       | Sev       | Pre                   | Fre       | Sev       | Pre                   | Fre                       | Sev                       |
| Apathy               | 42.5%                  | 1.0 (1.3) | 0.7 (0.9) | 49.2%                 | 1.1 (1.2) | 0.8 (0.9) | 60.2% <sup>a, e</sup> | 1.5 (1.4) <sup>a, b</sup> | 1.1 (1.0) <sup>a, b</sup> |
| Irritability         | 53.1%                  | 1.2 (1.2) | 0.9 (1.0) | 44.9%                 | 1.0 (1.2) | 0.8 (0.9) | 42.9%                 | 0.9 (1.2)                 | 0.7 (1.0)                 |
| Depression           | 31.0%                  | 0.5 (0.9) | 0.4 (0.7) | 26.5%                 | 0.5 (1.0) | 0.4 (0.8) | 32.1%                 | 0.7 (1.1)                 | 0.5 (0.8)                 |
| Anxiety              | 21.2%                  | 0.4 (0.9) | 0.3 (0.6) | 23.7%                 | 0.4 (0.8) | 0.4 (0.8) | 31.6% <sup>b</sup>    | 0.7 (1.1) <sup>c, d</sup> | 0.5 (0.9) <sup>d, e</sup> |
| Eating behaviors     | 21.2%                  | 0.4 ± 0.9 | 0.3 ± 0.7 | 20.1%                 | 0.4 ± 0.9 | 0.3 ± 0.7 | 31.4% <sup>e</sup>    | 0.7 ± 1.1 <sup>b</sup>    | 0.5 ± 0.8 <sup>b</sup>    |
| Night-time behaviors | 30.1%                  | 0.7 ± 1.1 | 0.5 ± 0.8 | 20.1%                 | 0.4 ± 0.9 | 0.3 ± 0.7 | 20.0%                 | 0.5 ± 1.0                 | 0.3 ± 0.7                 |
| Agitation            | 14.2 %                 | 0.3 (0.7) | 0.3 (0.7) | 15.3%                 | 0.3 (0.9) | 0.3 (0.7) | 16.2%                 | 0.3 (0.9)                 | 0.3 (0.7)                 |
| AMB                  | 8.0%                   | 0.2 ± 0.7 | 0.1 ± 0.4 | 12.1%                 | 0.3 ± 0.8 | 0.2 ± 0.5 | 18.9% <sup>d, e</sup> | 0.4 ± 1.0 <sup>d, e</sup> | 0.3 ± 0.7 <sup>d, e</sup> |
| Disinhibition        | 9.7%                   | 0.2 (0.7) | 0.2 (0.6) | 13.7%                 | 0.2 ± 0.6 | 0.2 ± 0.6 | 12.4%                 | 0.2 ± 0.6                 | 0.2 ± 0.6                 |
| Delusions            | 3.5%                   | 0.1 ± 0.4 | 0.1 ± 0.4 | 4.7%                  | 0.1 ± 0.5 | 0.1 ± 0.3 | 9.3% <sup>d, e</sup>  | 0.2 ± 0.7 <sup>e</sup>    | 0.2 ± 0.5 <sup>e</sup>    |
| Euphoria             | 4.4%                   | 0.1 (0.3) | 0.1 (0.4) | 5.3%                  | 0.1 (0.5) | 0.1 (0.4) | 6.0%                  | 0.1 (0.4)                 | 0.1 (0.3)                 |
| Hallucinations       | 5.3%                   | 0.1 (0.6) | 0.1 (1.1) | 1.2%                  | 0.0 ± 0.2 | 0.0 ± 0.2 | 4.6% <sup>e</sup>     | 0.1 ± 0.4                 | 0.1 ± 0.3                 |
| Overall              | 81.4%                  | 5.1 ± 4.6 | 3.8 ± 3.6 | 81.2%                 | 4.8 ± 4.5 | 3.8 ± 3.6 | 88.7% <sup>e</sup>    | 6.3 ± 5.1 <sup>b, d</sup> | 4.8 ± 3.9 <sup>b, d</sup> |

*Notes.* AD = Alzheimer's disease, MCI = mild cognitive impairment, Pre = prevalence (NPI frequency  $\times$  severity scores  $\geq 1$ ), Fre = NPI frequency score (range 0–4), Sev = NPI severity score (range 0–3), AMB = aberrant motor behaviors. Differences in prevalence rates tested using Chi-Square Tests, differences in frequency and severity scores tested using Kruskal-Wallis Tests.

<sup>a</sup> preclinical AD < AD dementia,  $p < 0.001$  after correcting for false discovery rate.

<sup>b</sup> MCI due to AD < AD dementia,  $p < 0.001$  after correcting for false discovery rate.

<sup>c</sup> MCI due to AD < AD dementia,  $p < 0.01$  after correcting for false discovery rate.

<sup>d</sup> preclinical AD < AD dementia,  $p < 0.05$  after correcting for false discovery rate.

<sup>e</sup> MCI due to AD < AD dementia,  $p < 0.05$  after correcting for false discovery rate.

**Table e-2. Within-subject and between-subject variances of cognitive and neuropsychiatric measures over time according to clinical AD stage.**

|                            | Preclinical AD at baseline |                      | MCI due to AD at baseline |                      | AD dementia at baseline |                      |
|----------------------------|----------------------------|----------------------|---------------------------|----------------------|-------------------------|----------------------|
|                            | <i>BS variance</i>         | <i>WS variance</i>   | <i>BS variance</i>        | <i>WS variance</i>   | <i>BS variance</i>      | <i>WS variance</i>   |
|                            | <i>(% explained)</i>       | <i>(% explained)</i> | <i>(% explained)</i>      | <i>(% explained)</i> | <i>(% explained)</i>    | <i>(% explained)</i> |
| <b>Cognitive measures</b>  |                            |                      |                           |                      |                         |                      |
| <b>MMSE</b>                | 1.42 (52.40%)              | 1.29 (47.60%)        | 3.51 (47.37%)             | 3.90 (52.63%)        | 14.55 (54.29%)          | 12.25 (45.71%)       |
| <b>Memory</b>              | 0.64 (64.65%)              | 0.35 (35.35%)        | 2.09 (59.71%)             | 1.41 (40.29%)        | 2.75 (60.04%)           | 1.83 (36.96%)        |
| <b>Attention</b>           | 0.48 (64.86%)              | 0.26 (35.14%)        | 1.07 (56.91%)             | 0.81 (43.09%)        | 10.73 (62.60%)          | 6.41 (37.40%)        |
| <b>Executive functions</b> | 0.61 (78.21%)              | 0.17 (21.79%)        | 0.87 (74.36%)             | 0.30 (25.64%)        | 2.14 (70.86%)           | 0.88 (29.14%)        |
| <b>Language</b>            | 0.19 (61.29%)              | 0.12 (38.71%)        | 0.36 (61.02%)             | 0.23 (38.98%)        | 1.86 (64.36%)           | 1.03 (35.64%)        |
| <b>Visuospatial</b>        | 0.08 (17.78%)              | 0.37 (82.22%)        | 0.49 (37.12%)             | 0.83 (62.88%)        | 11.72 (73.76%)          | 4.17 (26.24%)        |
| <b>Average % explained</b> | 56.53%                     | 43.47%               | 56.08%                    | 43.90%               | 64.32%                  | 35.18%               |
| <b>NPS measures</b>        |                            |                      |                           |                      |                         |                      |
| <b>NPI total score</b>     | 36.11 (46.16%)             | 42.12 (56.84%)       | 29.70 (37.85%)            | 48.77 (62.15%)       | 41.03 (37.25%)          | 69.12 (62.75%)       |
| <b>NPI-apathy</b>          | 0.84 (13.93%)              | 5.19 (86.07%)        | 1.40 (22.29%)             | 4.88 (77.71%)        | 2.24 (20.25%)           | 8.82 (79.75%)        |

|                            |               |               |               |               |               |               |
|----------------------------|---------------|---------------|---------------|---------------|---------------|---------------|
| <b>NPI-depression</b>      | 0.76 (25.25%) | 2.25 (74.75%) | 1.45 (31.94%) | 3.09 (68.06%) | 1.40 (29.60%) | 3.33 (70.40%) |
| <b>NPI-irritability</b>    | 2.23 (27.23%) | 5.96 (72.77%) | 1.43 (23.40%) | 4.68 (76.60%) | 2.16 (30.00%) | 5.04 (70.00%) |
| <b>Average % explained</b> | 28.14%        | 72.61%        | 28.87%        | 71.13%        | 29.28%        | 70.73%        |

---

Abbreviations: BS = between-subject, WS = within-subject, AD = Alzheimer's disease, MCI = mild cognitive impairment, MMSE = Mini-Mental State Examination.

**Table e-3. Associations between baseline NPS and concurrent cognitive performance according to clinical AD stage.**

| <b>Preclinical AD (n=113)</b> |                                |                     |                                |                                |                     |                                |
|-------------------------------|--------------------------------|---------------------|--------------------------------|--------------------------------|---------------------|--------------------------------|
|                               | <b>MMSE</b>                    | <b>Memory</b>       | <b>Attention</b>               | <b>EF</b>                      | <b>Language</b>     | <b>Visuospatial</b>            |
| <b>Agitation</b>              | 0.22 [-0.25, 0.69]             | 0.43 [-0.08, 0.93]  | -0.02 [-0.51, 0.48]            | -0.20 [-0.68, 0.27]            | -0.35 [-0.86, 0.16] | 0.35 [-0.09, 0.80]             |
| <b>AMB</b>                    | 0.01 [-0.61, 0.63]             | 0.31 [-0.37, 0.99]  | 0.32 [-0.32, 0.96]             | -0.20 [-0.81, 0.42]            | 0.11 [-0.59, 0.80]  | 0.30 [-0.31, 0.92]             |
| <b>Anxiety</b>                | 0.12 [-0.41, 0.65]             | 0.05 [-0.46, 0.55]  | 0.36 [-0.15, 0.86]             | 0.14 [-0.32, 0.60]             | 0.05 [-0.47, 0.58]  | 0.22 [-1.03, 1.46]             |
| <b>Delusions</b>              | 1.19 [0.06, 2.32] <sup>a</sup> | 0.47 [-0.67, 1.61]  | 1.22 [0.11, 2.33] <sup>a</sup> | 1.01 [-0.03, 2.06]             | -0.45 [-1.62, 0.72] | 1.25 [-0.90, 3.40]             |
| <b>Disinhibition</b>          | -0.45 [-0.97, 0.07]            | -0.12 [-0.72, 0.47] | -0.21 [-0.78, 0.36]            | -0.25 [-0.79, 0.29]            | 0.02 [-0.58, 0.62]  | 0.25 [-0.27, 0.78]             |
| <b>Eating behaviors</b>       | 0.21 [-0.22, 0.63]             | 0.05 [-0.39, 0.49]  | 0.05 [-0.38, 0.49]             | -0.09 [-0.50, 0.32]            | -0.13 [-0.59, 0.32] | 0.57 [0.14, 1.01] <sup>a</sup> |
| <b>Euphoria</b>               | 0.30 [-0.46, 1.06]             | 0.35 [-0.47, 1.18]  | 0.40 [-0.39, 1.20]             | 0.42 [-0.34, 1.18]             | -0.27 [-1.10, 0.56] | 0.15 [-0.54, 0.85]             |
| <b>Hallucinations</b>         | 0.36 [-0.52, 1.23]             | 0.22 [-0.71, 1.16]  | 0.24 [-0.67, 1.15]             | -0.24 [-1.11, 0.62]            | 0.19 [-0.75, 1.14]  | 0.71 [-0.12, 1.55]             |
| <b>Night-time behaviors</b>   | 0.09 [-0.26, 0.45]             | 0.42 [0.04, 0.79]   | 0.25 [-0.11, 0.62]             | 0.39 [0.04, 0.73] <sup>a</sup> | 0.17 [-0.21, 0.55]  | -0.15 [-0.50, 0.20]            |
| <b>MCI due to AD (n=321)</b>  |                                |                     |                                |                                |                     |                                |
|                               | <b>MMSE</b>                    | <b>Memory</b>       | <b>Attention</b>               | <b>EF</b>                      | <b>Language</b>     | <b>Visuospatial</b>            |
| <b>Agitation</b>              | 0.10 [-0.16, 0.36]             | 0.11 [-0.17, 0.40]  | -0.23 [-0.51, 0.05]            | -0.21 [-0.47, 0.06]            | -0.02 [-0.32, 0.28] | -0.01 [-0.30, 0.28]            |

|                             |                     |                                   |                                         |                                   |                                   |                     |
|-----------------------------|---------------------|-----------------------------------|-----------------------------------------|-----------------------------------|-----------------------------------|---------------------|
| <b>AMB</b>                  | 0.01 [-0.30, 0.31]  | -0.10 [-0.44, 0.23]               | -0.36 [-0.70, -0.03] <sup>a</sup>       | 0.00 [-0.32, 0.31]                | -0.19 [-0.54, 0.16]               | 0.17 [-0.19, 0.53]  |
| <b>Anxiety</b>              | 0.13 [-0.09, 0.35]  | 0.00 [-0.24, 0.25]                | -0.05 [-0.29, 0.19]                     | -0.02 [-0.25, 0.21]               | -0.10 [-0.35, 0.16]               | 0.04 [-0.21, 0.29]  |
| <b>Delusions</b>            | -0.12 [-0.57, 0.32] | -0.51 [-0.99, -0.04] <sup>a</sup> | -0.24 [-0.72, 0.24]                     | 0.00 [-0.45, 0.46]                | 0.20 [-0.31, 0.71]                | 0.18 [-0.30, 0.65]  |
| <b>Disinhibition</b>        | 0.13 [-0.14, 0.41]  | 0.41 [0.11, 0.71] <sup>a</sup>    | -0.20 [-0.50, 0.10]                     | -0.03 [-0.31, 0.25]               | -0.17 [-0.49, 0.15]               | 0.17 [-0.14, 0.48]  |
| <b>Eating behaviors</b>     | 0.00 [-0.24, 0.24]  | -0.04 [-0.30, 0.22]               | -0.21 [-0.47, 0.05]                     | -0.23 [-0.47, 0.02]               | -0.41 [-0.69, -0.14] <sup>a</sup> | -0.10 [-0.38, 0.18] |
| <b>Euphoria</b>             | 0.34 [-0.07, 0.74]  | 0.20 [-0.23, 0.64]                | 0.08 [-0.35, 0.52]                      | 0.08 [-0.33, 0.50]                | 0.20 [-0.26, 0.66]                | -0.36 [-0.80, 0.08] |
| <b>Hallucinations</b>       | -0.29 [-1.21, 0.62] | -0.62 [-1.55, 0.31]               | <b>-1.73 [-2.68, -0.79]<sup>b</sup></b> | -1.16 [-2.04, -0.29] <sup>a</sup> | -0.28 [-1.28, 0.72]               | -0.58 [-1.69, 0.53] |
| <b>Night-time behaviors</b> | 0.25 [-0.02, 0.48]  | 0.11 [-0.14, 0.37]                | -0.03 [-0.28, 0.22]                     | 0.06 [-0.18, 0.30]                | 0.16 [-0.11, 0.43]                | 0.00 [-0.27, 0.27]  |

---

**AD dementia (n=1,090)**

---

|                      | <b>MMSE</b>                             | <b>Memory</b>       | <b>Attention</b>                  | <b>EF</b>           | <b>Language</b>     | <b>Visuospatial</b>               |
|----------------------|-----------------------------------------|---------------------|-----------------------------------|---------------------|---------------------|-----------------------------------|
| <b>Agitation</b>     | <b>-0.27 [-0.43, -0.11]<sup>b</sup></b> | -0.01 [-0.19, 0.17] | -0.11 [-0.28, 0.05]               | -0.17 [-0.34, 0.00] | -0.08 [-0.25, 0.10] | -0.09 [-0.28, 0.10]               |
| <b>AMB</b>           | <b>-0.28 [-0.43, -0.13]<sup>b</sup></b> | -0.16 [-0.33, 0.01] | -0.22 [-0.37, 0.06]               | -0.09 [-0.25, 0.07] | -0.05 [-0.21, 0.12] | -0.20 [-0.38, -0.02] <sup>a</sup> |
| <b>Anxiety</b>       | -0.13 [-0.26, 0.00]                     | -0.08 [-0.22, 0.06] | -0.13 [-0.26, 0.00]               | -0.03 [-0.16, 0.11] | -0.01 [-0.15, 0.13] | -0.20 [-0.34, -0.05] <sup>a</sup> |
| <b>Delusions</b>     | -0.16 [-0.38, 0.06]                     | -0.15 [-0.39, 0.10] | -0.26 [-0.49, -0.04] <sup>a</sup> | -0.18 [-0.40, 0.05] | -0.13 [-0.37, 0.10] | -0.41 [-0.65, -0.16] <sup>a</sup> |
| <b>Disinhibition</b> | 0.02 [-0.16, 0.19]                      | 0.11 [-0.08, 0.30]  | 0.08 [-0.10, 0.27]                | -0.03 [-0.21, 0.16] | 0.03 [-0.17, 0.22]  | -0.07 [-0.27, 0.13]               |

|                             |                                         |                     |                                   |                                   |                                        |                                   |
|-----------------------------|-----------------------------------------|---------------------|-----------------------------------|-----------------------------------|----------------------------------------|-----------------------------------|
| <b>Eating behaviors</b>     | -0.07 [-0.20, 0.05]                     | 0.01 [-0.13, 0.15]  | -0.08 [-0.21, 0.05]               | -0.08 [-0.22, 0.05]               | -0.03 [-0.17, 0.11]                    | -0.06 [-0.20, 0.09]               |
| <b>Euphoria</b>             | <b>-0.27 [-0.41, -0.12]<sup>b</sup></b> | -0.17 [-0.33, 0.00] | -0.17 [-0.33, -0.02] <sup>a</sup> | -0.07 [-0.23, 0.08]               | -0.06 [-0.22, 0.10]                    | -0.19 [-0.37, -0.02] <sup>a</sup> |
| <b>Hallucinations</b>       | -0.41 [-0.70, -0.12] <sup>a</sup>       | -0.02 [-0.36, 0.31] | -0.35 [-0.65, -0.05] <sup>a</sup> | -0.37 [-0.68, -0.06] <sup>a</sup> | -0.09 [-0.40, 0.22]                    | -0.29 [-0.66, 0.07]               |
| <b>Night-time behaviors</b> | -0.13 [-0.27, 0.01]                     | 0.07 [-0.09, 0.23]  | -0.05 [-0.20, 0.10]               | 0.01 [-0.14, 0.16]                | <b>-0.29[-0.44, -0.13]<sup>a</sup></b> | -0.07 [-0.07, 0.09]               |

---

Abbreviations: AD = Alzheimer's disease, MCI = mild cognitive impairment, MMSE = Mini-mental state examination, EF = executive functions, AMB = aberrant motor behaviors.

Data are standardized estimated annual  $\beta$  [95% confidence interval] corrected for sex, age, and education.

<sup>a</sup>  $p < 0.05$ .

<sup>b</sup>  $p < 0.05$  after correcting for false discovery rate.

**Table e-4. Associations between baseline NPS and cognitive decline over time according to clinical AD stage.**

| <b>Preclinical AD (n=53)</b>         |                     |                     |                                |                                |                     |                     |
|--------------------------------------|---------------------|---------------------|--------------------------------|--------------------------------|---------------------|---------------------|
|                                      | <b>MMSE</b>         | <b>Memory</b>       | <b>Attention</b>               | <b>EF</b>                      | <b>Language</b>     | <b>Visuospatial</b> |
| <b>Agitation*Time</b>                | 0.11 [-0.24, 0.46]  | -0.03 [-0.30, 0.24] | -0.03 [-0.33, 0.27]            | -0.23 [-0.47, 0.01]            | 0.00 [-0.31, 0.31]  | 0.03 [-0.40, 0.46]  |
| <b>AMB*Time</b>                      | 0.28 [-0.12, 0.68]  | 0.24 [-0.09, 0.58]  | -0.19 [-0.55, 0.17]            | -0.17 [-0.47, 0.13]            | 0.30 [-0.07, 0.67]  | 0.05 [-0.45, 0.56]  |
| <b>Anxiety*Time</b>                  | 0.01 [-0.60, 0.63]  | -0.18 [-0.66, 0.30] | 0.74 [0.25, 1.24] <sup>a</sup> | 0.29 [-0.15, 0.73]             | 0.05 [-0.49, 0.59]  | -0.13 [-2.05, 1.79] |
| <b>Delusions*Time</b>                | 0.57 [-0.90, 2.03]  | 0.12 [-0.97, 1.22]  | 0.06 [-1.16, 1.28]             | 0.14 [-0.86, 1.15]             | -0.62 [-1.87, 0.62] | 1.96 [-1.67, 5.59]  |
| <b>Disinhibition*<br/>*Time</b>      | 0.12 [-0.22, 0.47]  | 0.05 [-0.23, 0.32]  | -0.12 [-0.43, 0.18]            | -0.19 [-0.44, 0.06]            | 0.14 [-0.18, 0.45]  | 0.03 [-0.40, 0.46]  |
| <b>Eating<br/>behaviors*Time</b>     | 0.25 [-0.15, 0.64]  | 0.17 [-0.15, 0.48]  | 0.04 [-0.30, 0.39]             | 0.19 [-0.10, 0.47]             | 0.00 [-0.36, 0.35]  | 0.02 [-0.47, 0.51]  |
| <b>Euphoria*Time</b>                 | -0.08 [-0.61, 0.45] | -0.19 [-0.59, 0.21] | -0.03 [-0.47, 0.42]            | -0.12 [-0.49, 0.25]            | -0.24 [-0.70, 0.21] | -0.02 [-0.66, 0.62] |
| <b>Hallucinations*<br/>Time</b>      | 0.13 [-0.43, 0.68]  | 0.01 [-0.42, 0.44]  | -0.03 [-0.50, 0.45]            | 0.50 [0.12, 0.88] <sup>a</sup> | 0.15 [-0.33, 0.64]  | -0.11 [-0.79, 0.58] |
| <b>Night-time<br/>behaviors*Time</b> | 0.02 [-0.23, 0.28]  | 0.18 [-0.02, 0.38]  | 0.14 [-0.08, 0.36]             | 0.12 [-0.06, 0.30]             | 0.12 [-0.11, 0.35]  | 0.13 [-0.20, 0.47]  |
| <b>MCI due to AD (n=142)</b>         |                     |                     |                                |                                |                     |                     |
|                                      | <b>MMSE</b>         | <b>Memory</b>       | <b>Attention</b>               | <b>EF</b>                      | <b>Language</b>     | <b>Visuospatial</b> |



|                                      |                     |                     |                                   |                                   |                                   |                     |
|--------------------------------------|---------------------|---------------------|-----------------------------------|-----------------------------------|-----------------------------------|---------------------|
| <b>Agitation*Time</b>                | 0.03 [-0.13, 0.20]  | 0.05 [-0.10, 0.19]  | 0.00 [-0.16, 0.16]                | 0.03 [-0.09, 0.15]                | 0.07 [-0.09, 0.22]                | -0.03 [-0.24, 0.18] |
| <b>AMB*Time</b>                      | 0.08 [-0.17, 0.32]  | 0.15 [-0.05, 0.36]  | -0.09 [-0.33, 0.15]               | 0.11 [-0.07, 0.29]                | 0.05 [-0.18, 0.28]                | 0.07 [-0.25, 0.38]  |
| <b>Anxiety*Time</b>                  | 0.14 [-0.02, 0.30]  | -0.04 [-0.17, 0.10] | 0.05 [-0.11, 0.20]                | 0.08 [-0.04, 0.20]                | 0.03 [-0.13, 0.18]                | 0.10 [-0.09, 0.29]  |
| <b>Delusions*Time</b>                | 0.05 [-0.30, 0.40]  | 0.06 [-0.23, 0.35]  | 0.06 [-0.28, 0.39]                | -0.04 [-0.30, 0.22]               | -0.03 [-0.37, 0.30]               | 0.03 [-0.39, 0.45]  |
| <b>Disinhibition*<br/>Time</b>       | 0.01 [-0.19, 0.22]  | 0.14 [-0.04, 0.33]  | 0.07 [-0.14, 0.27]                | 0.11 [-0.04, 0.27]                | 0.15 [-0.06, 0.35]                | 0.08 [-0.17, 0.33]  |
| <b>Eating<br/>behaviors*Time</b>     | 0.01 [-0.16, 0.17]  | -0.04 [-0.18, 0.10] | 0.00 [-0.16, 0.16]                | -0.07 [-0.19, 0.06]               | -0.25 [-0.41, -0.08] <sup>a</sup> | -0.10 [-0.30, 0.11] |
| <b>Euphoria*Time</b>                 | -0.20 [-0.42, 0.02] | -0.14 [-0.32, 0.04] | -0.27 [-0.48, -0.06] <sup>a</sup> | -0.26 [-0.42, -0.10] <sup>a</sup> | -0.07 [-0.28, 0.14]               | -0.23 [-0.49, 0.04] |
| <b>Hallucinations*<br/>Time</b>      | N/A <sup>#</sup>    | N/A <sup>#</sup>    | N/A <sup>#</sup>                  | N/A <sup>#</sup>                  | N/A <sup>#</sup>                  | N/A <sup>#</sup>    |
| <b>Night-time<br/>behaviors*Time</b> | 0.14 [-0.01, 0.30]  | 0.06 [-0.07, 0.19]  | 0.02 [-0.13, 0.17]                | -0.09 [-0.21, 0.02]               | 0.07 [-0.09, 0.22]                | -0.09 [-0.28, 0.10] |

**AD dementia (n=325)**

|                       | <b>MMSE</b>         | <b>Memory</b>       | <b>Attention</b>                  | <b>EF</b>           | <b>Language</b>    | <b>Visuospatial</b> |
|-----------------------|---------------------|---------------------|-----------------------------------|---------------------|--------------------|---------------------|
| <b>Agitation*Time</b> | -0.07 [-0.18, 0.04] | 0.00 [-0.11, 0.12]  | -0.04 [-0.15, 0.07]               | 0.00 [-0.10, 0.10]  | 0.07 [-0.04, 0.18] | -0.08 [-0.18, 0.02] |
| <b>AMB*Time</b>       | -0.03 [-0.14, 0.07] | -0.02 [-0.13, 0.08] | -0.15 [-0.25, -0.05] <sup>a</sup> | -0.09 [-0.18, 0.00] | 0.05 [-0.06, 0.15] | -0.02 [-0.12, 0.08] |

|                                      |                     |                                   |                                |                                   |                                |                      |
|--------------------------------------|---------------------|-----------------------------------|--------------------------------|-----------------------------------|--------------------------------|----------------------|
| <b>Anxiety*Time</b>                  | 0.02 [-0.06, 0.10]  | -0.02 [-0.10, 0.07]               | -0.06 [-0.14, 0.02]            | 0.01 [-0.06, 0.08]                | 0.03 [-0.05, 0.11]             | -0.01 [-0.08, 0.07]  |
| <b>Delusions*Time</b>                | 0.12 [-0.07, 0.32]  | -0.14 [-0.35, 0.06]               | -0.14 [-0.33, 0.06]            | -0.03 [-0.20, 0.14]               | -0.01 [-0.21, 0.19]            | -0.24 [-0.41, -0.07] |
| <b>Disinhibition*<br/>Time</b>       | 0.09 [-0.03, 0.21]  | -0.09 [-0.22, 0.04]               | -0.02 [-0.14, 0.10]            | 0.01 [-0.10, 0.12]                | 0.13 [0.01, 0.25] <sup>a</sup> | 0.09 [-0.02, 0.20]   |
| <b>Eating<br/>behaviors*Time</b>     | 0.01 [-0.07, 0.08]  | 0.00 [-0.08, 0.08]                | 0.00 [-0.08, 0.07]             | -0.01 [-0.08, 0.06]               | 0.05 [-0.03, 0.13]             | 0.04 [-0.03, 0.11]   |
| <b>Euphoria*Time</b>                 | -0.06 [-0.22, 0.11] | -0.24 [-0.44, -0.05] <sup>a</sup> | -0.09 [-0.28, 0.09]            | -0.19 [-0.35, -0.03] <sup>a</sup> | 0.12 [-0.06, 0.31]             | -0.02 [-0.17, 0.14]  |
| <b>Hallucinations*<br/>Time</b>      | -0.09 [-0.29, 0.10] | 0.10 [-0.11, 0.32]                | 0.05 [-0.15, 0.26]             | 0.09 [-0.09, 0.28]                | 0.04 [-0.16, 0.24]             | 0.06 [-0.13, 0.25]   |
| <b>Night-time<br/>behaviors*Time</b> | 0.03 [-0.06, 0.12]  | -0.02 [-0.11, 0.07]               | 0.12 [0.03, 0.20] <sup>a</sup> | 0.06 [-0.02, 0.14]                | 0.04 [-0.05, 0.13]             | 0.01 [-0.07, 0.09]   |

---

Abbreviations: AD = Alzheimer's disease, MCI = mild cognitive impairment, MMSE = Mini-mental state examination, EF = executive functions, AMB = aberrant motor behaviors.

Data are standardized estimated annual  $\beta$  [95% confidence interval] corrected for sex, age, and education.

<sup>a</sup>  $p < 0.05$ .

<sup>b</sup>  $p < 0.05$  after correcting for false discovery rate.

<sup>#</sup> No patients with MCI and hallucinations at baseline had follow-up assessments available.
